# Supplementary material for: The co-delivery of adenovirus-based immune checkpoint vaccine elicits a potent anti-tumor effect in renal carcinoma
Source: PubMed Central journal article supplement (PMC10403580; doi:10.1038/s41541-023-00706-x), 2023-08-04
Supplement: 41541_2023_706_MOESM1_ESM.pdf [file 41541_2023_706_MOESM1_ESM.pdf]

## Supplementary Figures

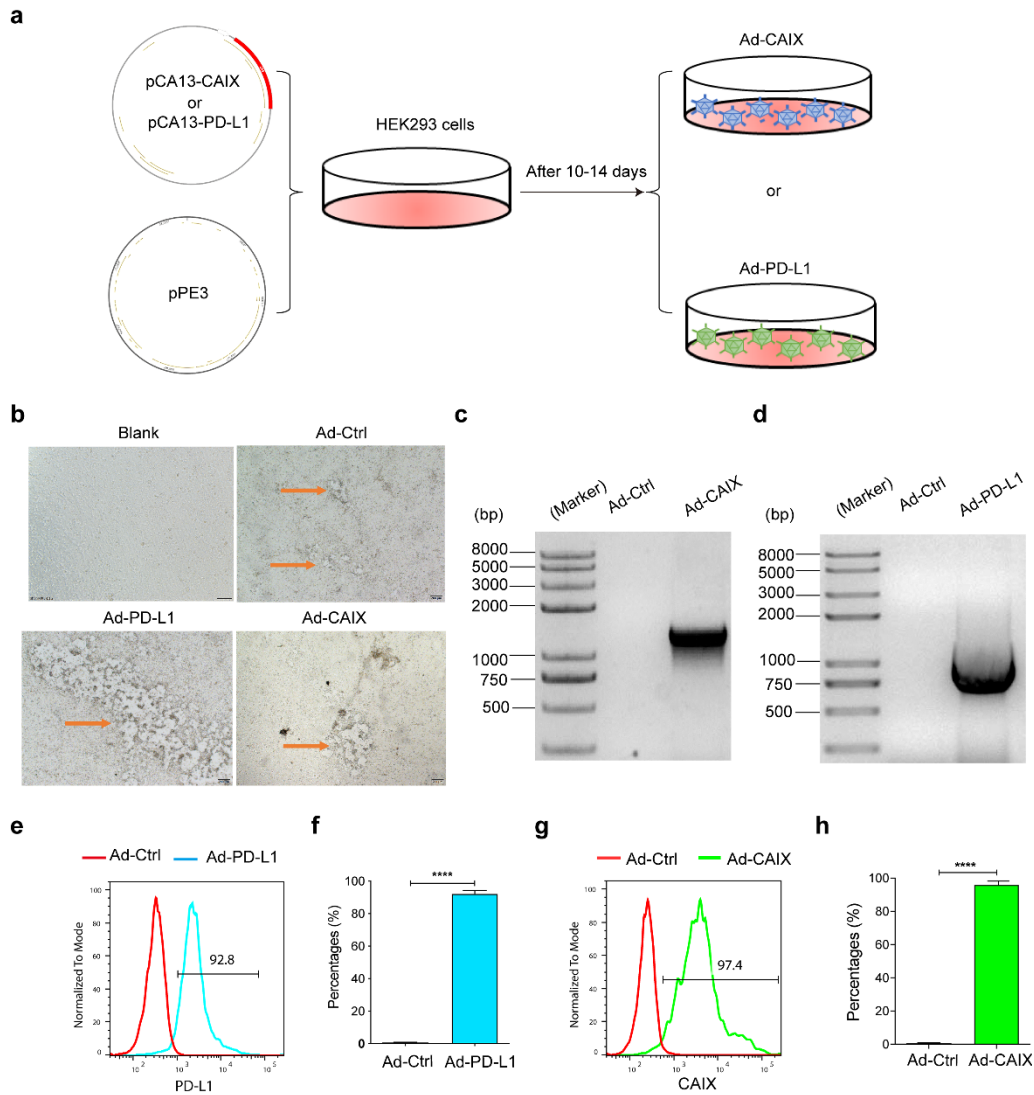

### Supplementary Figure 1. The generation and expression of Ad-CAIX and Ad-PD-L1. **a**

Schematic diagram of replication-deficient Ad packaging. **b** Plaque formation can be observed in Ad-Ctrl, Ad-PD-L1, and Ad-CAIX groups 14 days after co-transfection. **c, d** Identification of Ad-CAIX and Ad-PD-L1 by PCR analysis. HEK293 cells were respectively infected with Ad-Ctrl, Ad-CAIX, or Ad-PD-L1. The viral DNA extracted from the infected supernatant was used as DNA templates. Lane 1 displays DNA size standards (Kb). Lane 2 shows extracted Ad-Ctrl DNA as a template. Lane 3 shows extracted Ad-CAIX or Ad-PD-L1 DNA as a template. **e, f** The

high expression of Ad-PD-L1 in vitro. Purified Ad-PD-L1 are inoculated with HEK293 cells at MOI=5, respectively, while Ad-Ctrl is seeded at the same MOI as the control. The flow cytometry analysis was performed 48h after infection. **g, h** The expression of Ad-CAIX in vitro. Data were from one representative experiment of three performed and presented as mean  $\pm$  SD. The different significance was set at \*\*\*\* $p < 0.0001$ . Two groups of comparison data were analyzed by two-tailed independent Student's t-test.

### Supplementary Figure 2

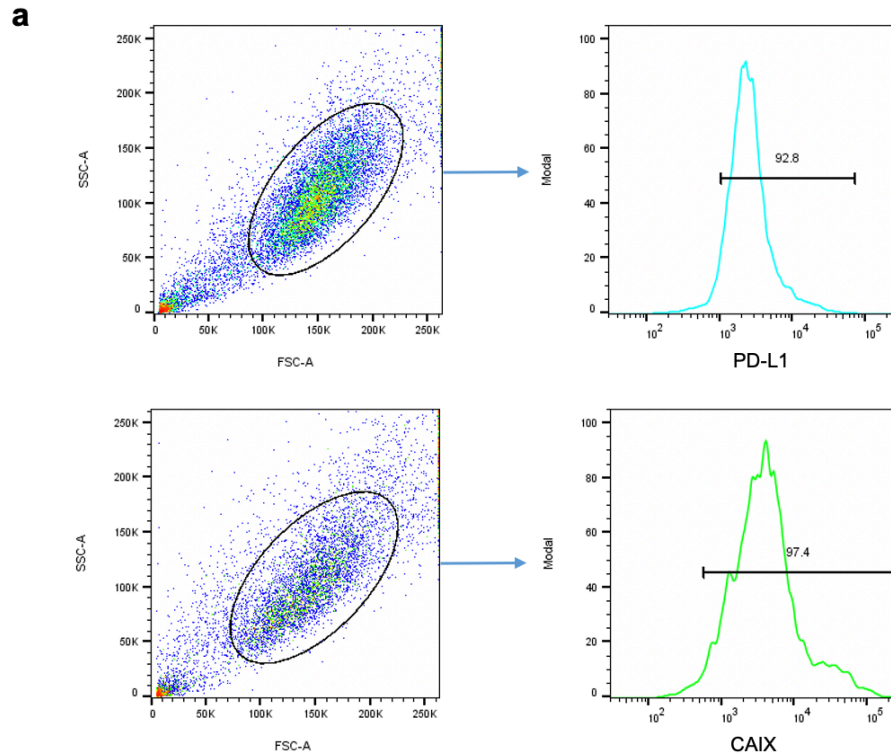

**b**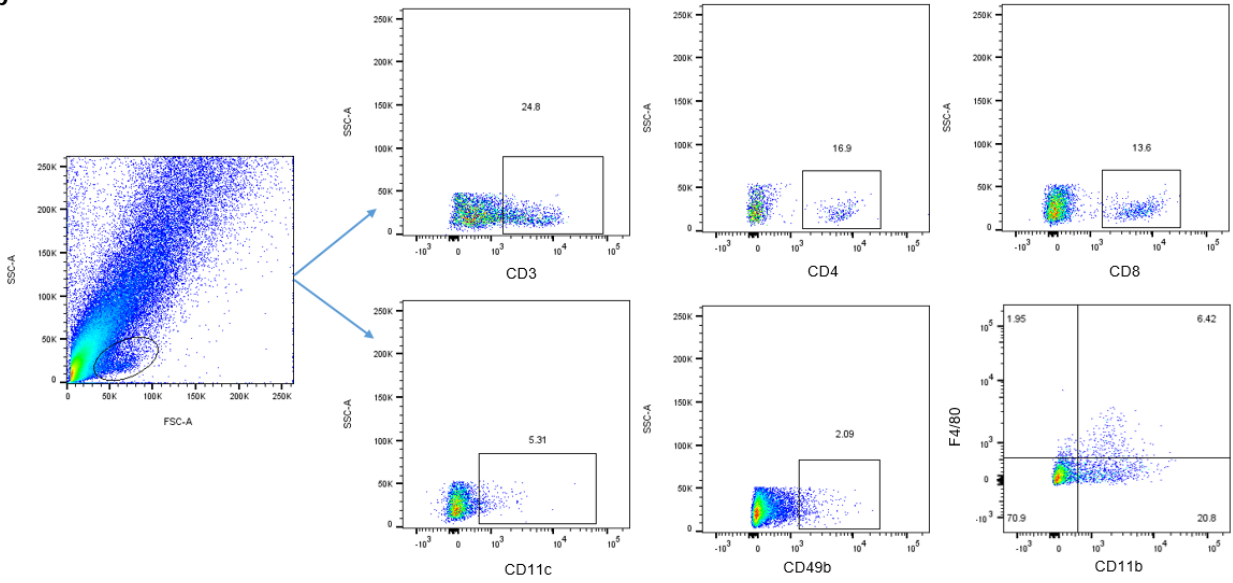**c**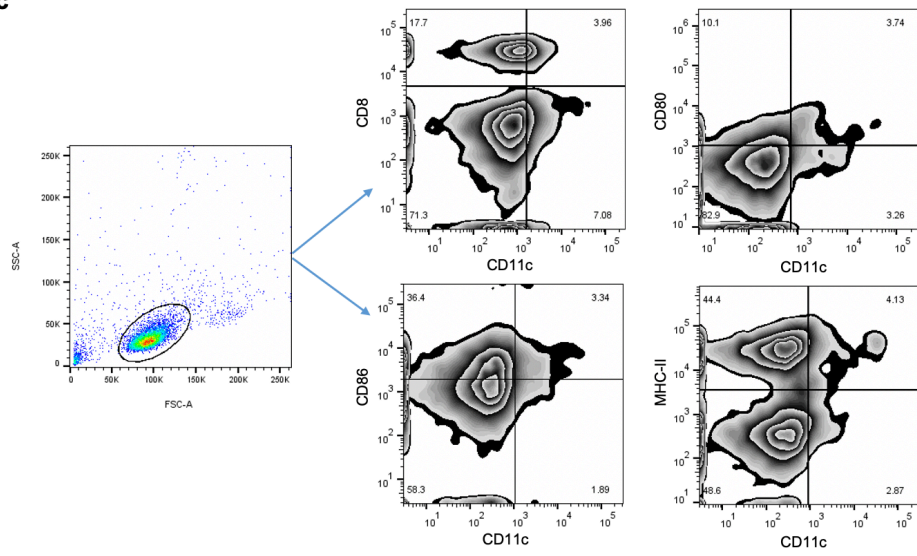**d**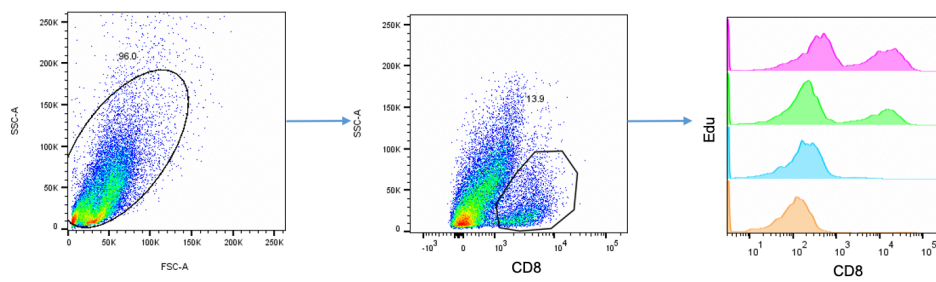

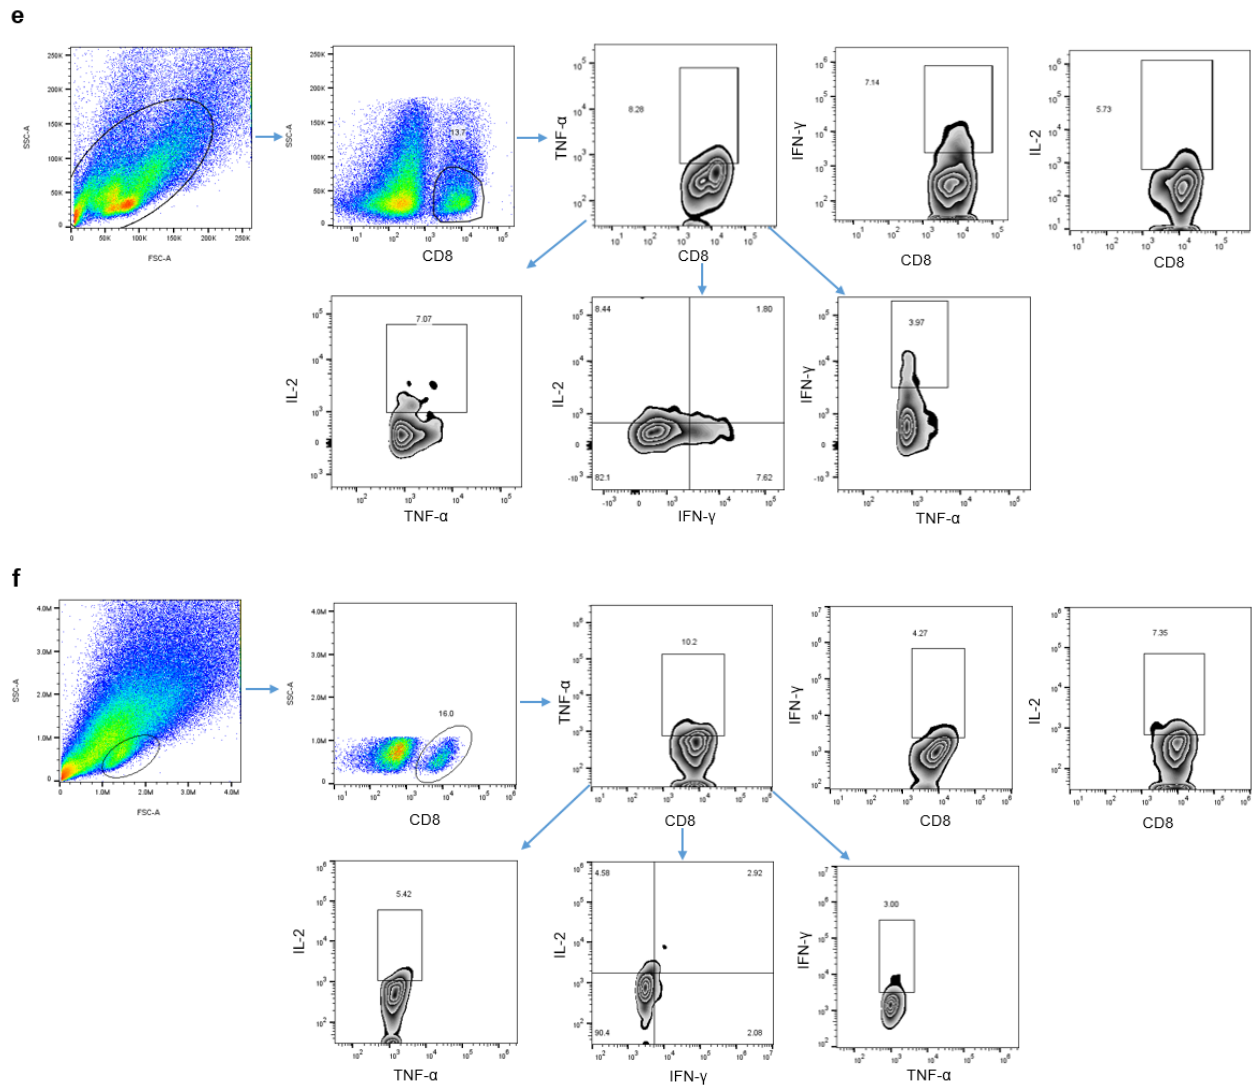

**Supplementary Figure 2. Gating strategies used for cell analysis by flow cytometry. a**

Gating strategy to detect the expression of PD-L1 or CAIX on 293T cells infected by Ad-PD-L1 or Ad-CAIX presented on supplementary Fig. 1e, g. **b** Gating strategy to analyze the percentages of immune cells from tumors of immunized mice presented on Fig. 1e. **c** Gating strategy to analyze the percentages of CD11c<sup>+</sup> or CD11c<sup>+</sup>CD8<sup>+</sup> cells and the expression of CD80, CD86, or MHC-II on CD11c<sup>+</sup> cells in the spleen of Ad vaccines-treated mice presented on Fig. 2a, d. **d** Gating strategy to analyze the percentages of CD8<sup>+</sup>Edu<sup>+</sup> cells from the splenocytes of Ad vaccines-treated mice for in vitro cultures presented on Fig. 3a. **e, f** Gating strategy to analyze

the proportions of IL-2<sup>+</sup>CD8<sup>+</sup>, IFN- $\gamma$ <sup>+</sup>CD8<sup>+</sup>, TNF- $\alpha$ <sup>+</sup>CD8<sup>+</sup>, TNF- $\alpha$ <sup>+</sup>IFN- $\gamma$ <sup>+</sup>CD8<sup>+</sup>, TNF- $\alpha$ <sup>+</sup>IL-2<sup>+</sup>CD8<sup>+</sup>, IFN- $\gamma$ <sup>+</sup>IL-2<sup>+</sup>CD8<sup>+</sup>, and TNF- $\alpha$ <sup>+</sup>IFN- $\gamma$ <sup>+</sup>IL-2<sup>+</sup>CD8<sup>+</sup> T cells in splenocytes cultured in vitro or TILs from each group presented on Fig. 3d, Fig. 4a, b, Fig. 5g, and Fig. 6i, j.
